CORRECTION

# Correction: Neural and behavioural responses of the pollen-specialist bee *Andrena vaga* to *Salix* odours

Hannah Burger, Melanie Marquardt, Katharina Babucke, Kim C. Heuel, Manfred Ayasse, Stefan Dötter and C. Giovanni Galizia

There was an error in *J. Exp. Biol.* (2021) 224, jeb242166 (doi:10.1242/jeb.242166).

In Fig. 5A, the dose–response curve for 2-phenylethanol (square, grey lines) was omitted. The corrected figure appears below, and both the online full-text and PDF versions of the article have been updated.

The authors apologise for any inconvenience.

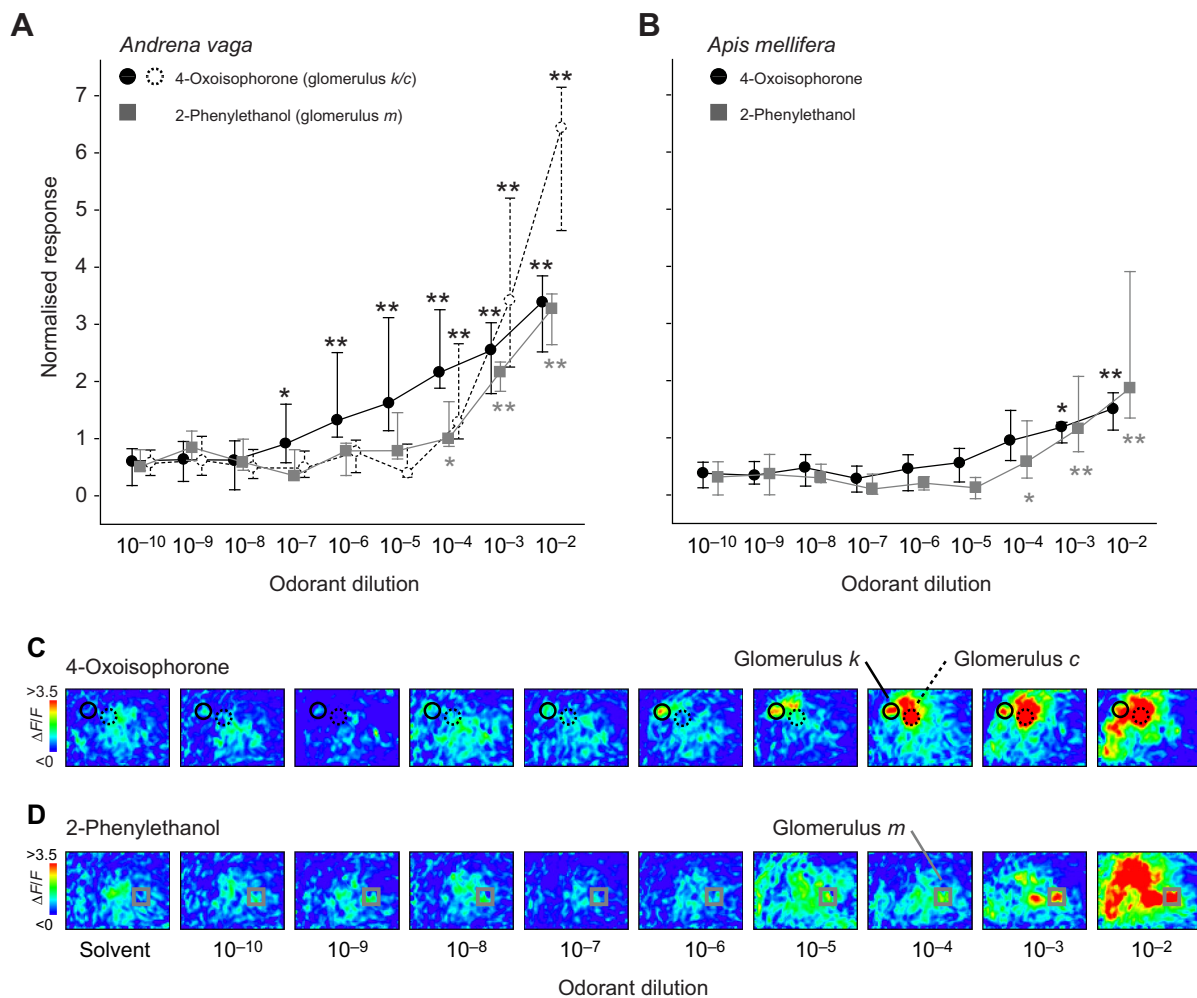

**Fig. 5 (corrected).** 4-Oxoisophorone evoked strong responses in the antennal lobes of *Andrena vaga*, but not *Apis mellifera*. Dose–response relationships (median, whiskers 25–75% of normalized data) in (A) *A. vaga* ( $N=13$  individuals) and (B) *A. mellifera* ( $N=11$  individuals) bees responding to 4-oxoisophorone (dots, black lines) and 2-phenylethanol (squares, grey lines). Asterisks indicate a significantly higher response compared to stimulations with a solvent control (Friedman’s test with *post hoc* analysis,  $*P<0.05$ ;  $**P<0.001$ ). The glomerular response pattern and the region of selected glomeruli are shown for the different dilutions of (C) 4-oxoisophorone in glomeruli *k* and *c* and (D) 2-phenylethanol in glomerulus *m* of the right antennal lobe of a representative *A. vaga* female coded in false-colour using calcium imaging (symbols of glomeruli correspond to symbols used in the dose–response curves).

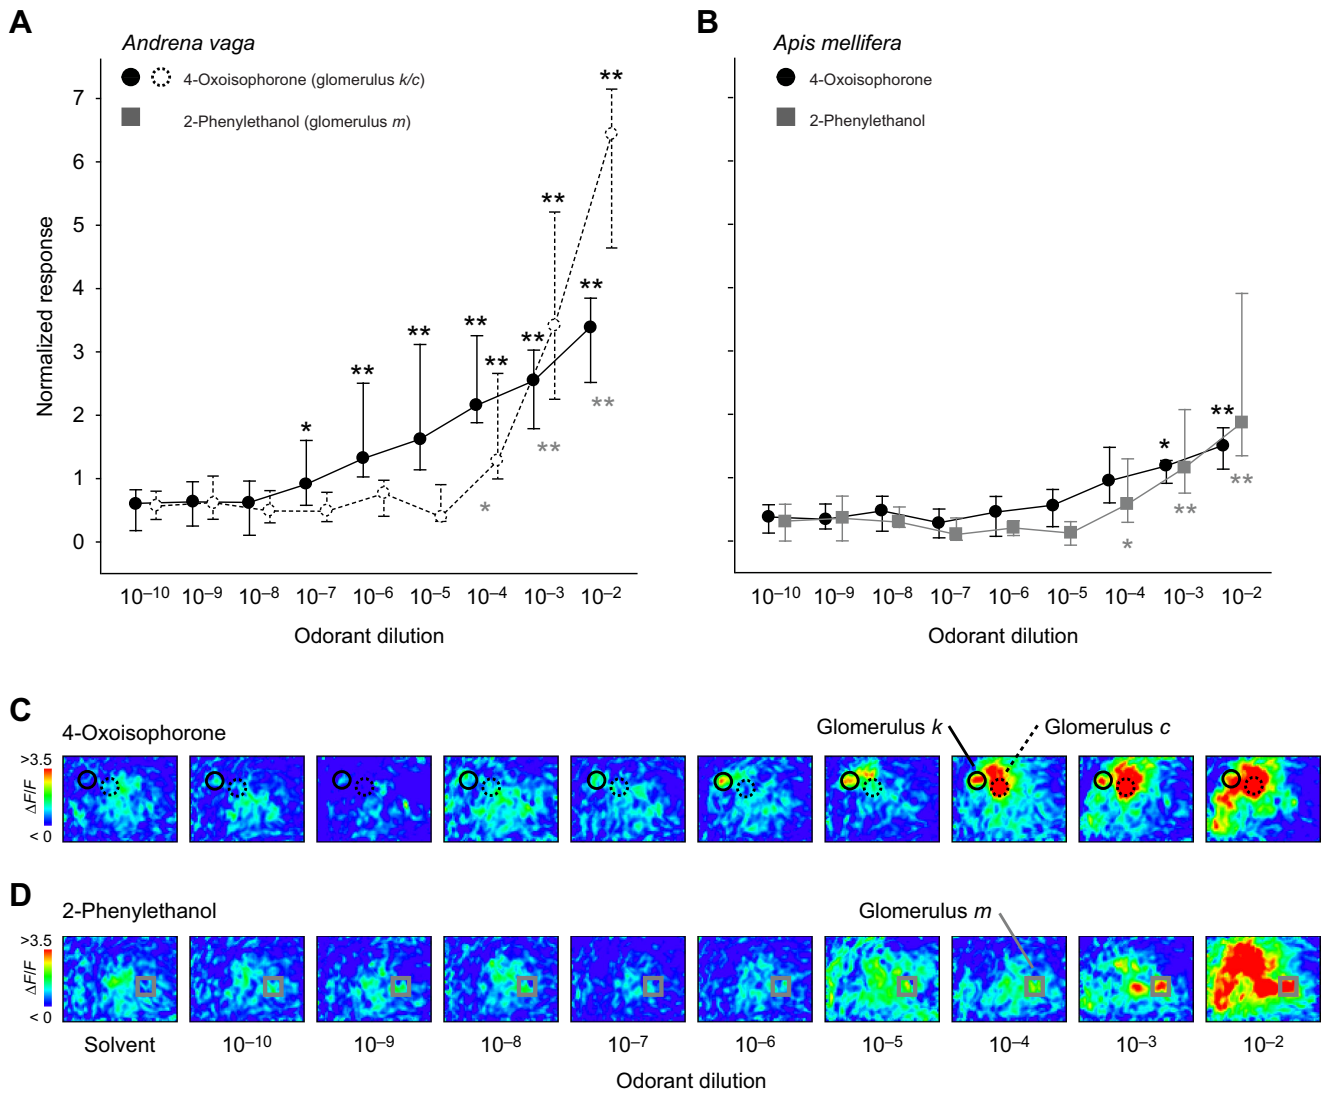

**Fig. 5 (original).** 4-Oxisophorone evoked strong responses in the antennal lobes of *Andrena vaga*, but not *Apis mellifera*. Dose–response relationships (median, whiskers 25–75% of normalized data) in (A) *A. vaga* ( $N=13$  individuals) and (B) *A. mellifera* ( $N=11$  individuals) bees responding to 4-oxisophorone (dots, black lines) and 2-phenylethanol (square, grey lines). Asterisks indicate a significantly higher response compared to stimulations with a solvent control (Friedman’s test with *post hoc* analysis,  $*P<0.05$ ;  $**P<0.001$ ). The glomerular response pattern and the region of selected glomeruli are shown for the different dilutions of (C) 4-oxisophorone in glomeruli *k* and *c* and (D) 2-phenylethanol in glomerulus *m* of the right antennal lobe of a representative *A. vaga* female coded in false-colour using calcium imaging (symbols of glomeruli correspond to symbols used in the dose–response curves).
